# Supplementary material for: In vivo acute toxicity evaluation and in vitro molecular mechanism study of antiproliferative activity of a novel indole Schiff base β-diiminato manganeseIII complex in hormone-dependent and triple negative breast cancer cells
Source: PeerJ. 2019 Oct 7;7:e7686. doi: 10.7717/peerj.7686 (PMC6786247; doi:10.7717/peerj.7686)
Supplement: Supplemental Information 1 [file peerj-07-7686-s001.xlsx]

## Sheet: MTT assay
MCF-7								MCF-7
48h								72h
Concentration	ABS 1	ABS 2	ABS 3					Concentration	ABS 1	ABS 2	ABS 3
25	0.0933	0.0874	0.088					25	6.42609	6.76522	6.56522
12.5	0.0921	0.1058	0.0876					12.5	6.56522	6.3913	6.73043
6.25	0.1132	0.1059	0.1001					6.25	7.8087	8.06087	8.18261
3.125	0.2004	0.1896	0.1829					3.125	9.85455	9.84545	10.3091
1.56	0.2633	0.2922	0.2669					1.56	13.2091	14.0273	14.3636
0.78	0.4547	0.4319	0.4287					0.78	20.4182	22.4727	21.9091
0.39	0.7251	0.7321	0.6928					0.39	38.5364	40.9727	36.5091
0.19	0.9033	0.8823	0.891					0.19	81.1364	71.9364	83.9727
0.09	0.969	0.9919	0.9293					0.09	89.0091	90.7091	93.8273
CTRL	1.0679	1.0071	1.0651					CTRL	1.1552	1.0654	1.1083
MDA-MB-231								MDA-MB-231
48h								72h
Concentration	ABS 1	ABS 2	ABS 3					Concentration	ABS 1	ABS 2	ABS 3
25	0.0829	0.1096	0.0992					25	0.0807	0.1036	0.0963
12.5	0.1107	0.1021	0.1174					12.5	0.0874	0.1029	0.0941
6.25	0.11	0.1103	0.1244					6.25	0.1073	0.1064	0.098
3.125	0.1296	0.1189	0.1185					3.125	0.0921	0.1096	0.1013
1.5625	0.3761	0.3581	0.3586					1.5625	0.3402	0.2672	0.2326
0.78125	1.1829	0.9829	1.0654					0.78125	1.0413	0.9899	1.0668
0.390625	1.0729	1.2478	1.0683					0.390625	1.1057	1.1943	1.1706
0.195312	1.2124	1.33	1.0784					0.195312	1.414	1.4892	1.2182
ctrl	1.3785	1.7684	1.1618					ctrl	1.5635	1.6528	1.8832

## Sheet: Synergistic study
			MCF-7											MDA-MB-231
Doxorubicin									Doxorubicin
Concentrations	ABS	ABS	ABS						Concentrations	ABS	ABS	ABS
50	0.1214	0.1121	0.1042						25	0.1555	0.1606	0.1967
25	0.1232	0.1213	0.1291						12.5	0.2538	0.208	0.2023
12.5	0.1905	0.1926	0.172						6.25	0.2634	0.2759	0.2876
6.25	0.2408	0.2612	0.2551						3.12	0.4412	0.3911	0.4219
3.12	0.2996	0.2989	0.3097						1.56	0.5394	0.5602	0.5665
1.56	0.3881	0.3607	0.422						0.78	0.6404	0.6446	0.6992
0.78	0.4429	0.4102	0.3876						0.39	0.7867	0.8229	0.8385
0.39	0.4249	0.4729	0.4338						0.19	0.9733	0.9764	0.8679
Ctrl	0.665	0.6147	0.7851						Ctrl	1.0137	0.9901	1.0025
Tamoxifen									Tamoxifen
Concentrations	ABS	ABS	ABS						Concentrations	ABS	ABS	ABS
50	0.0652	0.0654	0.0663						50	0.0693	0.0692	0.0768
25	0.0824	0.0877	0.0818						25	0.0726	0.0671	0.066
12.5	0.2095	0.199	0.1992						12.5	0.2965	0.3806	0.3298
6.25	0.4863	0.4872	0.5168						6.25	0.7608	0.7646	0.8697
3.12	0.5085	0.5637	0.4955						3.12	0.8473	0.8436	0.8642
1.56	0.6108	0.5846	0.6057						1.56	0.8657	0.8913	0.8814
0.78	0.5763	0.6507	0.6127						0.78	0.9532	0.9976	0.9354
0.39	0.7038	0.6943	0.6346						0.39	0.9992	0.9798	0.9606
ctrl	0.6678	0.7966	0.7464						Ctrl	0.8605	0.9736	1.0385
Mn complex									Mn complex
Concentrations	ABS	ABS	ABS						Concentrations	ABS	ABS	ABS
50	0.082	0.0794	0.0805						50	0.0902	0.0884	0.0903
25	0.0891	0.0855	0.0898						25	0.0902	0.1067	0.0823
12.5	0.089	0.0851	0.0914						12.5	0.0935	0.0884	0.1027
6.25	0.1038	0.1003	0.104						6.25	0.1618	0.1479	0.1382
3.12	0.1957	0.1488	0.1797						3.12	0.2148	0.2252	0.2169
1.56	0.3473	0.3313	0.3422						1.56	0.2998	0.3301	0.3344
0.78	0.6404	0.6202	0.6389						0.78	0.453	0.4273	0.4334
0.39	0.7282	0.7775	0.7974						0.39	0.5004	0.4981	0.4714
0.19	0.5866	0.5113	0.7188						ctrl	0.5835	0.5543	0.5258
Ctrl	0.9072	0.9887	0.9434
combination of Dox/Mn complex									combination of Dox/Mn complex
Concentrations	ABS	ABS	ABS						Concentrations	ABS	ABS	ABS
12.5,12.5	0.0812	0.0824	0.0806						12.5,12.5	0.0907	0.0867	0.0881
6.25,6.25	0.0792	0.0837	0.082						6.25,6.25	0.0865	0.0938	0.0905
3.12,3.12	0.087	0.087	0.0909						3.12,3.12	0.1123	0.1073	0.1359
1.56,1.56	0.1646	0.1523	0.1466						1.56,1.56	0.5037	0.4583	0.5439
0.78,0.78	0.2658	0.3042	0.2517						0.78,0.78	0.6772	0.5142	0.5698
0.39,0.39	0.4903	0.4712	0.3905						0.39,0.39	0.9017	1.119	0.8824
Ctrl	0.7195	0.728	0.7035						Ctrl	1.159	1.2221	1.35
combination of Tamo/Mn complex									combination of Tamo/Mn complex
Concentrations	ABS	ABS	ABS						Concentrations	ABS	ABS	ABS
50/6.25	0.0768	0.0801	0.078						50,12.5	0.0803	0.0775	0.0783
25/3.12	0.0856	0.0824	0.0815						25,6.25	0.0726	0.0748	0.0759
12.5/1.56	0.2201	0.2395	0.2659						12.5,3.12	0.2531	0.2209	0.2422
6.25/0.78	0.562	0.5014	0.5751						6.25,1.56	0.6938	0.7476	0.7796
3.12/0.39	0.784	0.6244	0.6984						3.12,0.78	0.8322	0.7601	0.8696
1.56/0.19	0.8054	0.7111	0.7054						1.56,0.39	0.9455	0.9386	0.9947
Ctrl	0.885	0.9453	1.0022						Ctrl	1.0749	1.1486	1.1042

## Sheet: caspase activity
LI: luminescence intensity
		Caspase 8							cspase 9						cspase 3/7
18h						18h						24h
MCF-7						MCF-7						MCF-7
Concentration	LI 1	LI 2	LI 3			Concentration	LI 1	LI 2	LI 3			Concentration	LI 1	LI 2	LI 3
1.5 ug/ml	2321	2368	2354			1.5 ug/ml	10317	10363	10410			1.5 ug/ml	33143	32485	32989
3 ug/ml	1531	1524	1578			3 ug/ml	4624	4636	4610			3 ug/ml	18728	16556	18510
Ctrl	3122	2836	2536			Ctrl	8369	8407	8256			Ctrl	10385	10845	10336
MDA-MB-231						MDA-MB-231						MDA-MB-231
Concentration	LI 1	LI 2	LI 3			Concentration	LI 1	LI 2	LI 3			Concentration	LI 1	LI 2	LI 3
2.5 ug/ml	5994	5299	5465			2.5 ug/ml	18627	20893	20127			2.5 ug/ml	60305	65147	62544
5 ug/ml	1386	1414	1560			5 ug/ml	5710	5260	5628			5 ug/ml	16254	15918	15171
Ctrl	2849	2975	2830			Ctrl	15949	15668	15348			Ctrl	27272	27324	27320
24h						24h
MCF-7						MCF-7
Concentration	LI 1	LI 2	LI 3			Concentration	LI 1	LI 2	LI 3
1.5 ug/ml	2375	2470	2420			1.5 ug/ml	8148	8053	8120
3 ug/ml	1362	1478	1397			3 ug/ml	6365	6392	6389
Ctrl	2976	2945	2895			Ctrl	7993	8566	7432
MDA-MB-231						MDA-MB-231
Concentration	LI 1	LI 2	LI 3			Concentration	LI 1	LI 2	LI 3
2.5 ug/ml	4318	4248	4311			2.5 ug/ml	14076	16610	16234
5 ug/ml	1396	1423	1485			5 ug/ml	12521	12046	12234
Ctrl	3418	3354	3211			Ctrl	14362	14757	14574

## Sheet: gene expression
MCF-7
		GAPDH				BAX				BCL2
UT(negative control)	10.9279	10.9228	10.7605		16.9641	16.8176	16.735		27.7072	27.8005	27.7336
Mn complex	11.5397	11.7232	11.5225		17.6553	17.3851	17.3492		29.4725	29.1719	29.2738
		GAPDH(ct)				p21(Ct)				cyclind1(Ct)				caspase-3
UT(negative control)	16.5523	16.216	16.0204		27.0576	26.9864	26.6512		7.63304	8.4994	7.76186		25.5188	25.5947	25.6583
Mn complex	17.5698	17.5836	17.4908		26.6756	26.4595	26.6757		11.8142	11.9291	11.9512		25.7081	25.5862	25.9456
		GAPDH				TNF
UT(negative control)	12.8586	12.7875	12.7547		32.4333	32.2617	32.4891
Mn complex	13.9413	13.6277	13.5802		28.1283	28.1848	28.2001
		GAPDH				caspase-8				caspase-10
UT(negative control)	15.2779	15.2483	15.3497		20.6753	20.7128	20.645		33.2454	33.0813	33.0966
Mn complex	16.0939	16.0124	15.9662		21.2563	21.3536	21.4183		33.1758	33.1982	33.2193
MDA-MB-231
		GAPDH				BAX				BCL2
UT(negative control)	15.0146	15.201	15.1811		21.9291	21.8457	21.7432		29.1316	29.127	29.1169
Mn complex	16.065	15.9944	15.9889		21.7732	22.0593	22.0932		30.4483	30.4004	30.398
		GAPDH(ct)				P21				CYCLIND1				Caspase-3
UT(negative control)	16.3003	16.334	16.2004		30.851	30.6579	30.2696		18.964	19.0061	19.2107		22.2972	22.301	22.4734
Mn complex	17.0978	17.0817	17.039		28.5489	28.1678	28.3338		20.5723	20.471	20.51		22.7405	22.7914	22.8072
		GAPDH				TNF
UT(negative control)	13.6285	13.6657	13.7553		33.4703	33.4415	33.4602
Mn complex	14.7665	14.6508	14.6427		32.4464	32.5202	32.695
		GAPDH				caspase 8				caspase-10
UT(negative control)	16.0565	15.88	15.9442		19.9567	19.9842	20.0765		30.1749	30.4023	30.5531
Mn complex	16.6622	16.4544	16.5374		19.6018	19.6314	19.6207		29.7088	29.6428	29.9596
